# Supplementary material for: 1-Butylimidazole-derived ionic liquids: synthesis, characterisation and evaluation of their antibacterial, antifungal and anticancer activities
Source: Royal Society of Chemistry journal article supplement (doi:10.1039/c4ra08370a), 2014-01-01
Supplement: c4ra08370a1.pdf [file c4ra08370a1.pdf]

Electronic Supplementary Information

**1-Butylimidazole derive ionic liquids: Synthesis,  
characterization and their evaluations of antibacterial,  
antifungal and anticancer activities**

Prabodh Ranjan, Bheru Singh Kitawat and Man Singh

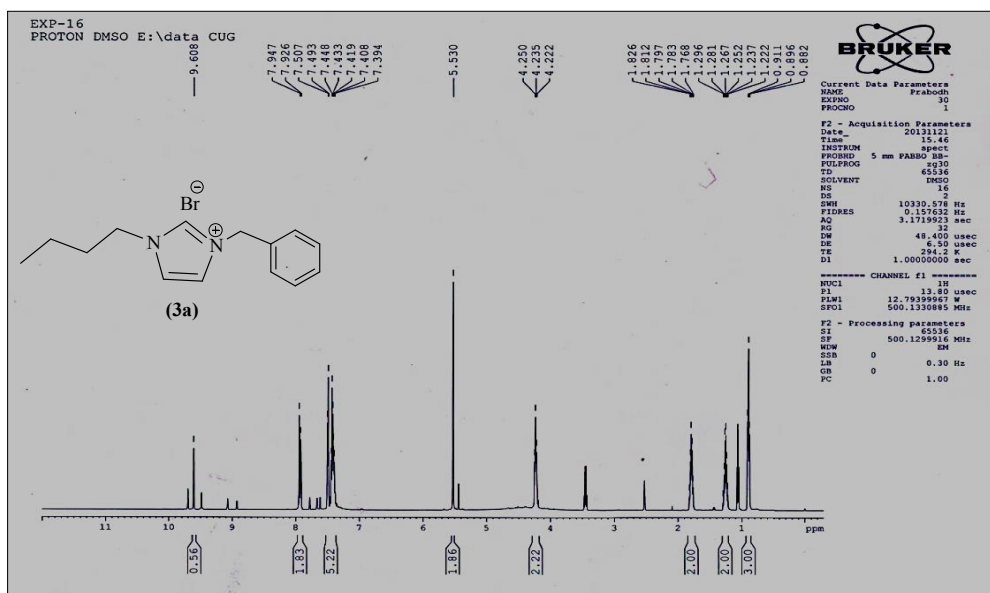

Figure 1.1: <sup>1</sup>H NMR spectra of 3-benzyl-1-butyl-1*H*-imidazol-3-ium bromide (3a)

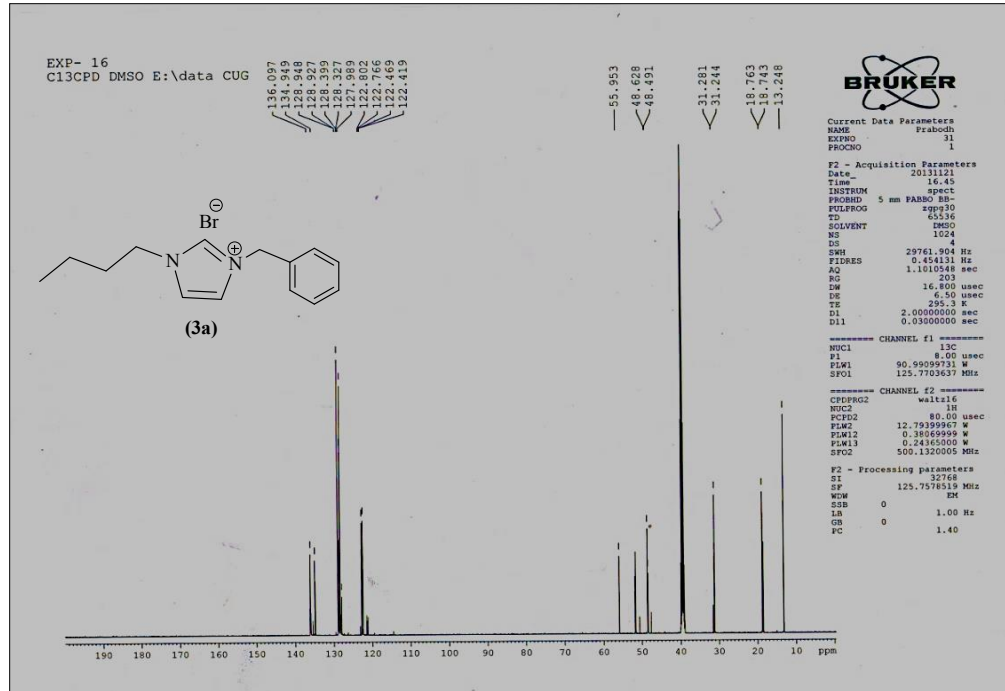

Figure 1.2:  $^{13}\text{C}$  NMR spectra of 3-benzyl-1-butyl-1*H*-imidazol-3-ium bromide (3a)

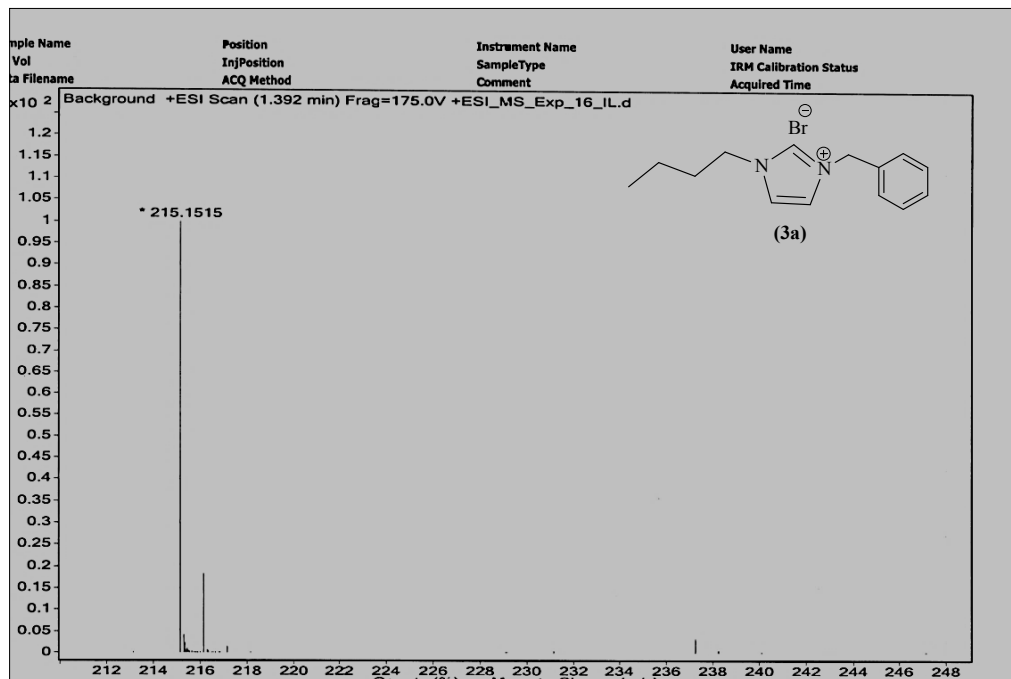

Figure 1.3: Mass spectra of 3-benzyl-1-butyl-1*H*-imidazol-3-ium bromide (3a)

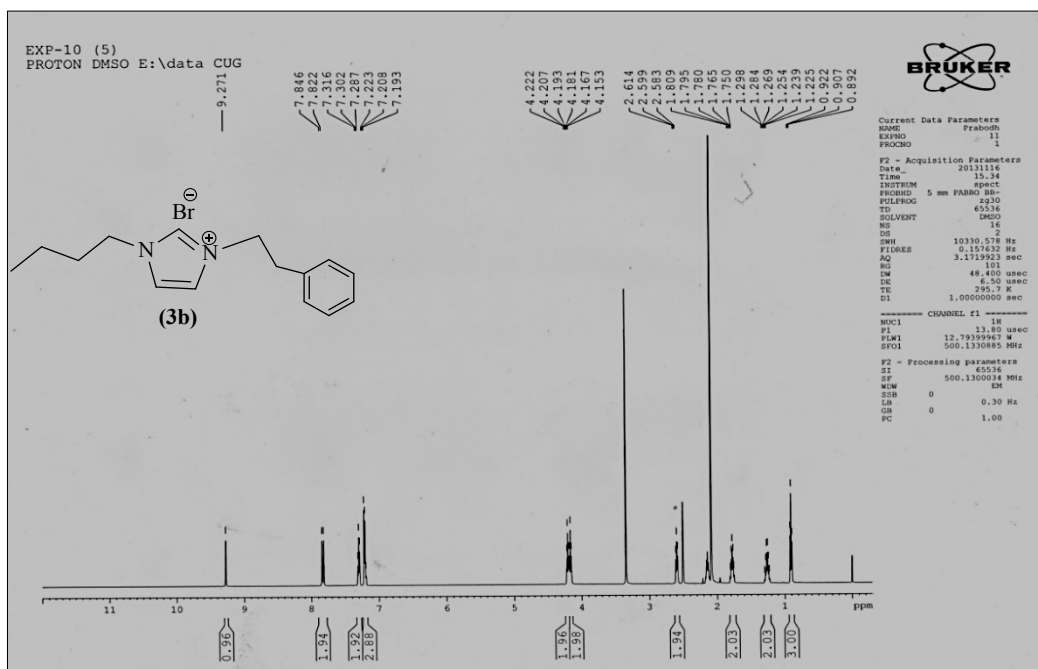

Figure 1.4:  $^1\text{H}$  NMR spectra of 1-butyl-3-phenethyl-1*H*-imidazol-3-ium bromide (**3b**)

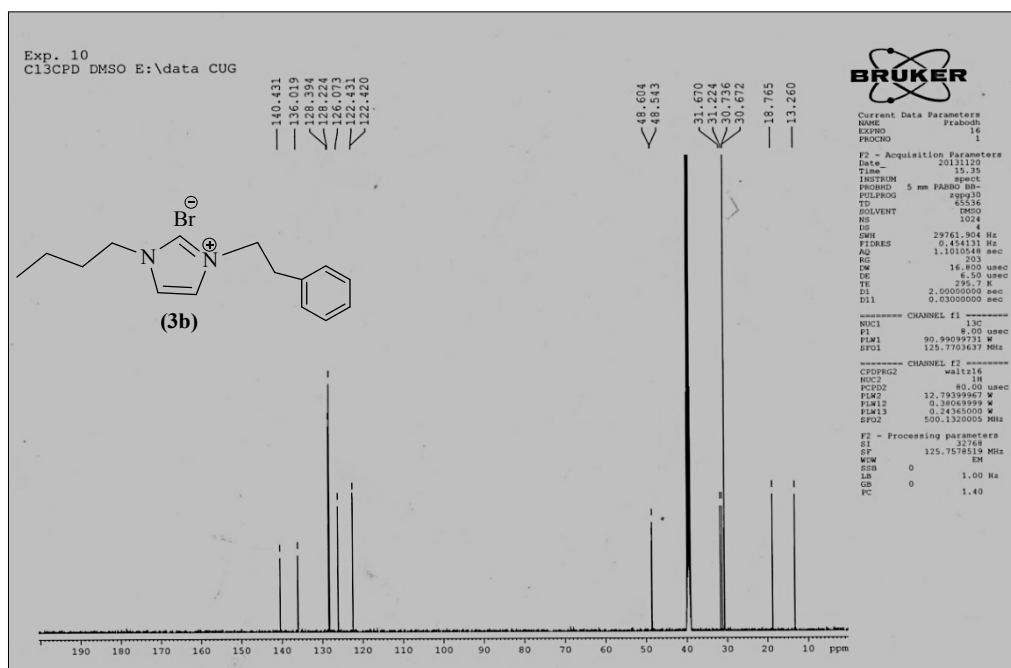

Figure 1.5:  $^{13}\text{C}$  NMR spectra of 1-butyl-3-phenethyl-1*H*-imidazol-3-ium bromide (**3b**)

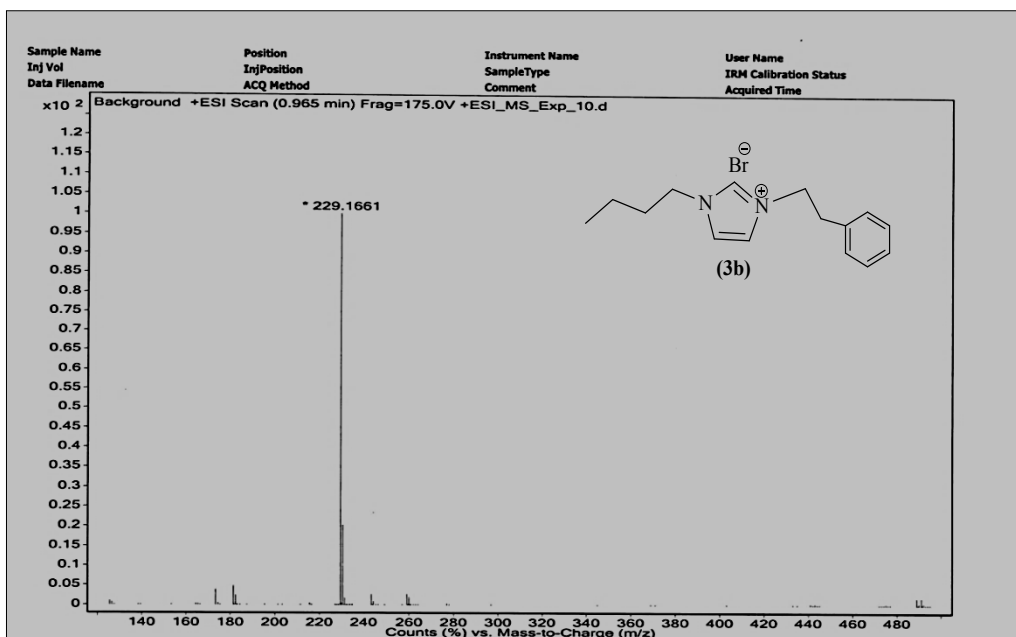

Figure 1.6: Mass spectra of 1-butyl-3-phenethyl-1*H*-imidazol-3-ium bromide (3b)

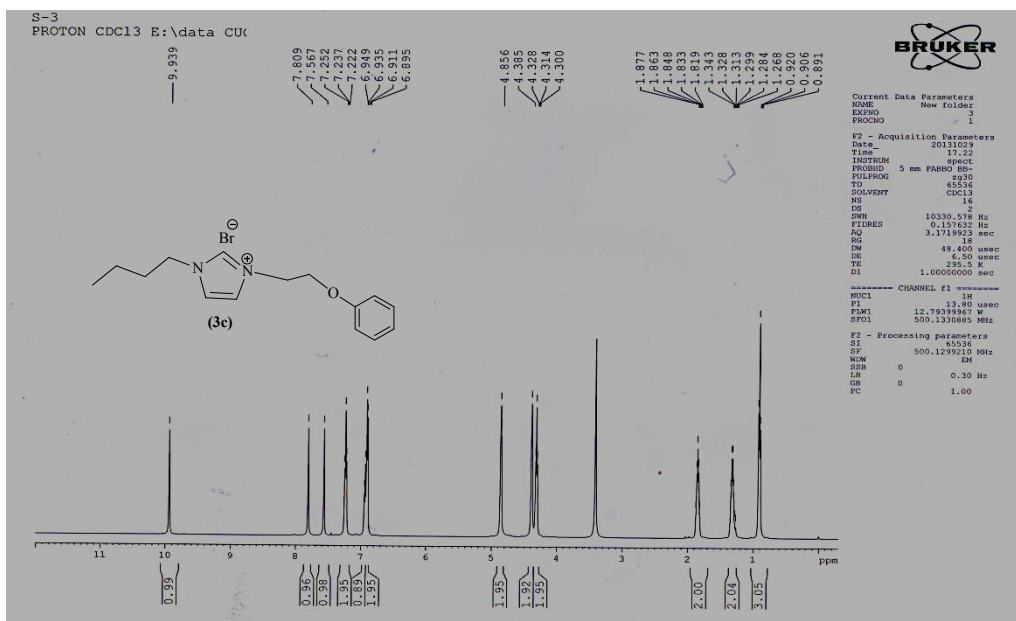

Figure 1.7: <sup>1</sup>H NMR spectra of 1-butyl-3-(2-phenoxyethyl)-1*H*-imidazol-3-ium bromide (3c)

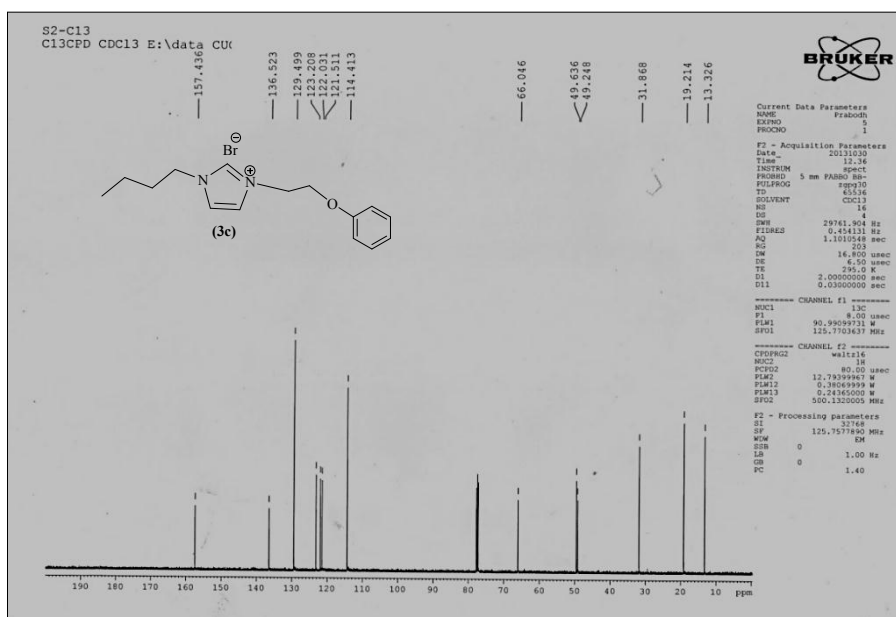

Figure 1.8:  $^{13}\text{C}$  NMR spectra of 1-butyl-3-(2-phenoxyethyl)-1*H*-imidazol-3-ium bromide (3C)

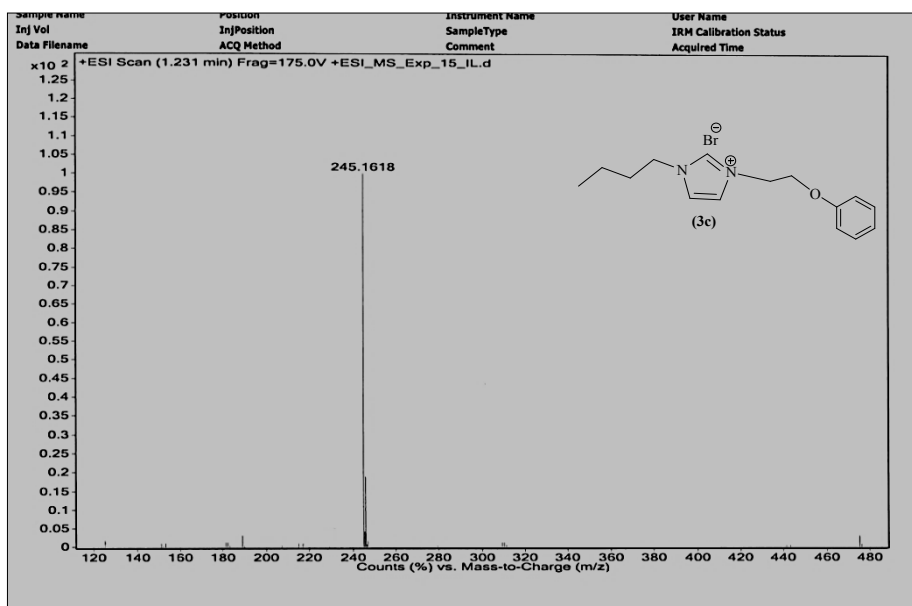

Figure 1.9: Mass spectra of 1-butyl-3-(2-phenoxyethyl)-1*H*-imidazol-3-ium bromide (3C)

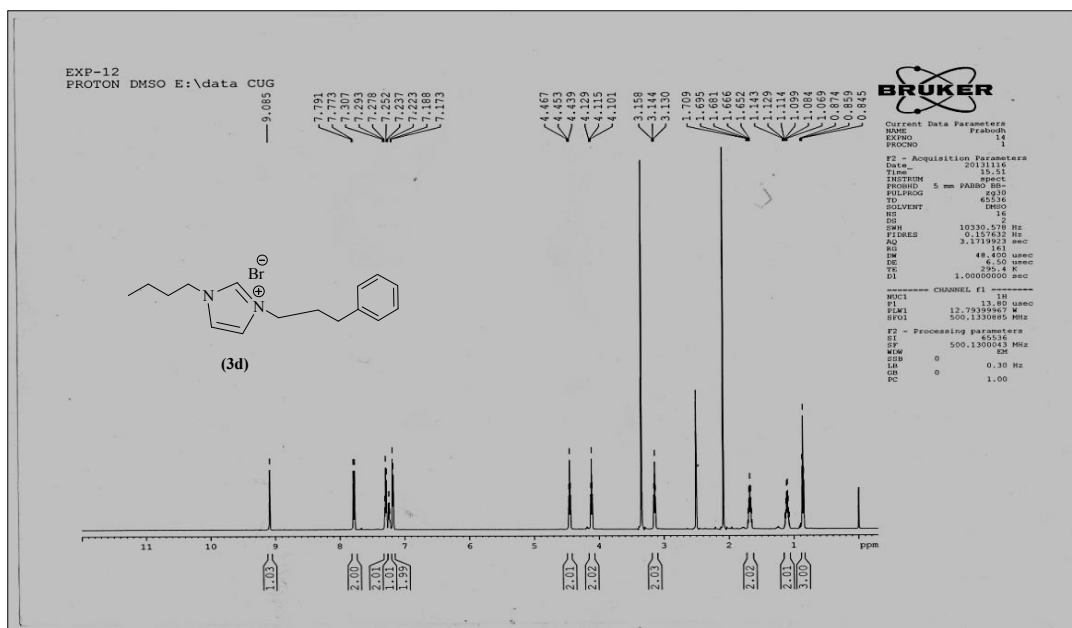

Figure 1.10:  $^1\text{H}$  spectra of 1-butyl-3-(3-phenylpropyl)-1*H*-imidazol-3-ium bromide (3d)

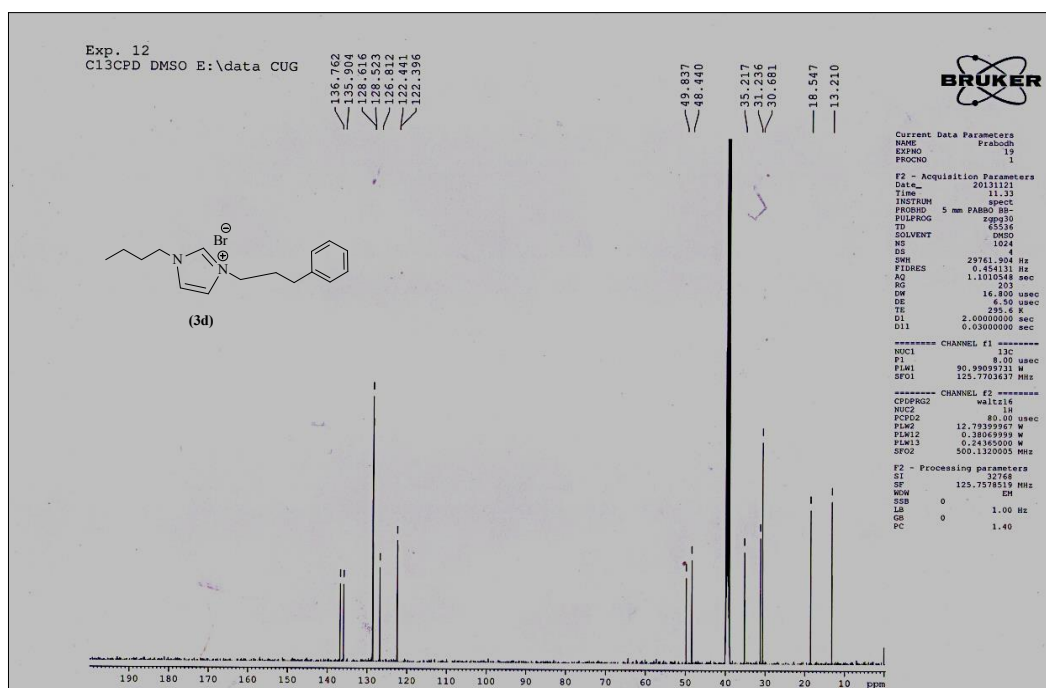

Figure 1.11:  $^{13}\text{C}$  spectra of 1-butyl-3-(3-phenylpropyl)-1*H*-imidazol-3-ium bromide (3d)

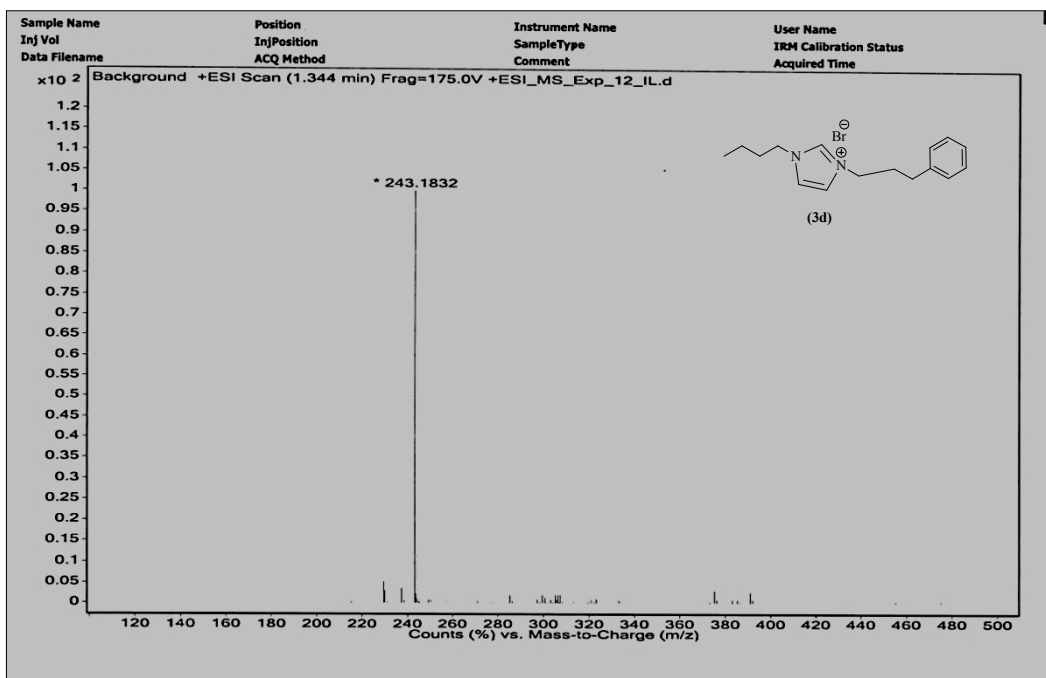

Figure 1.12: Mass spectra of 1-butyl-3-(3-phenylpropyl)-1*H*-imidazol-3-ium bromide (3d)

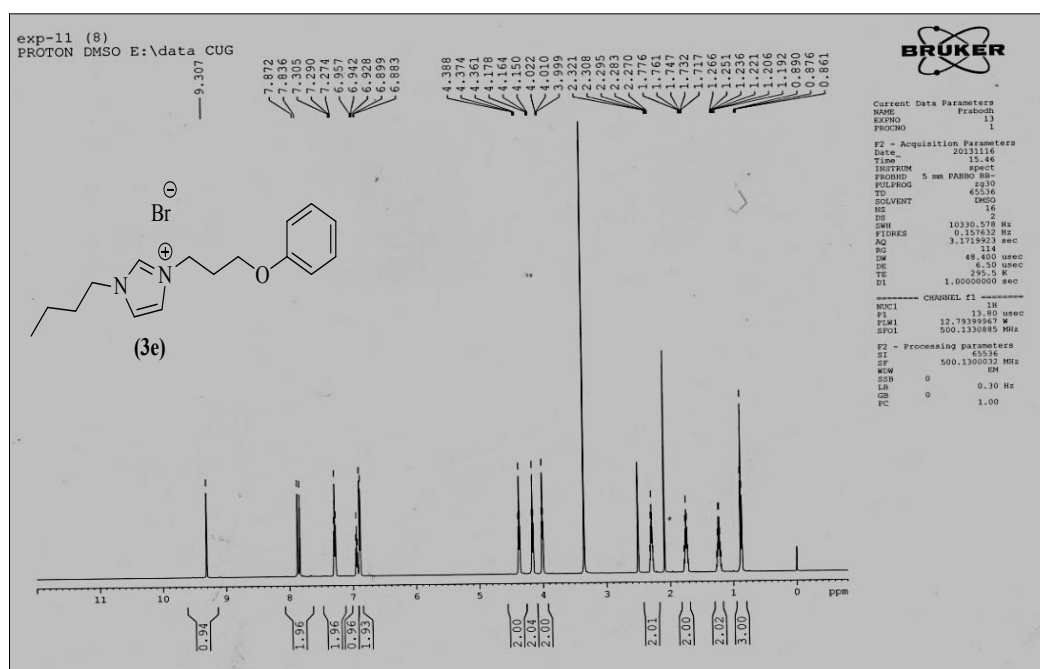

Figure 1.13: <sup>1</sup>H spectra of 1-butyl-3-(3-phenoxypropyl)-1*H*-imidazol-3-ium bromide (3e)

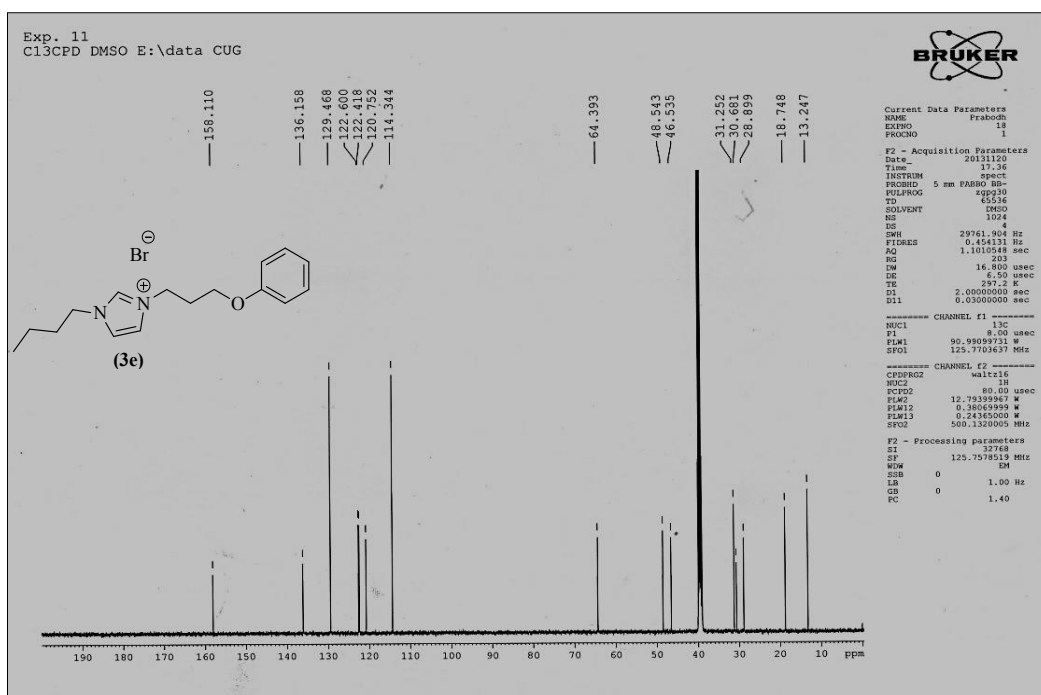

Figure 1.14:  $^{13}\text{C}$  spectra of 1-butyl-3-(3-phenoxypropyl)-1*H*-imidazol-3-ium bromide (**3e**)

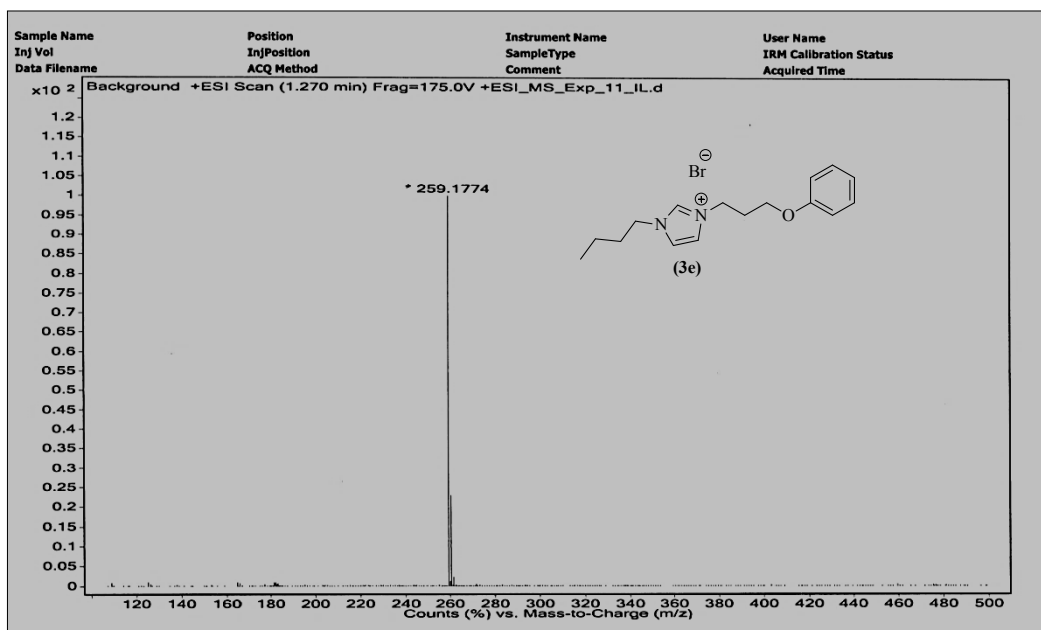

Figure 1.15: Mass spectra of 1-butyl-3-(3-phenoxypropyl)-1*H*-imidazol-3-ium bromide (**3e**)



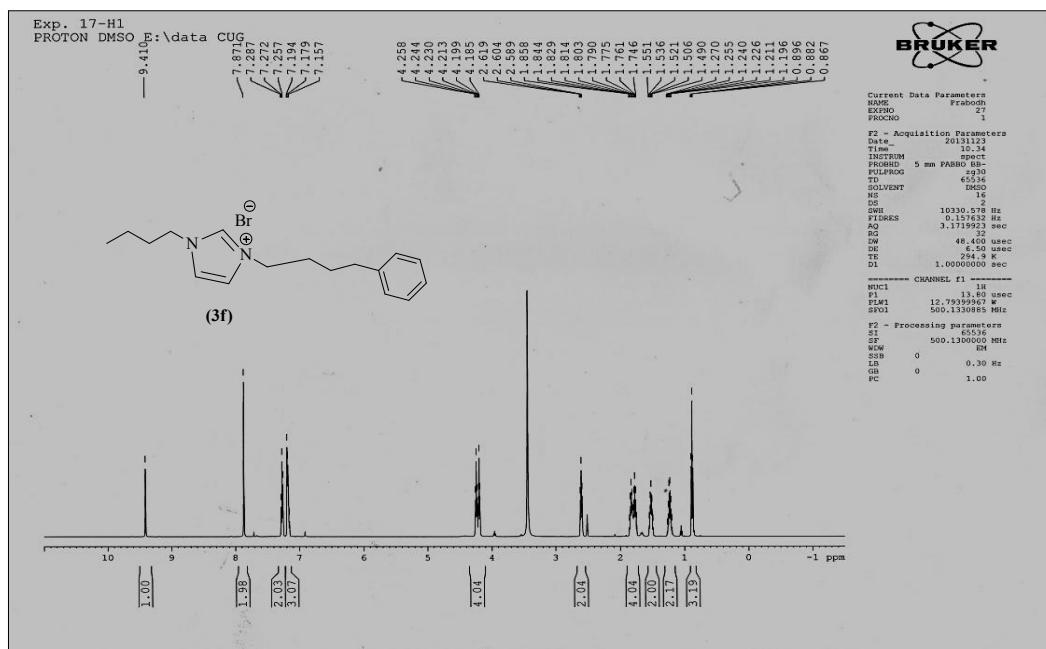

Figure 1.16:  $^1\text{H}$  spectra of NMR spectra of 1-butyl-3-(4-phenylbutyl)-1*H*-imidazol-3-ium (3f)

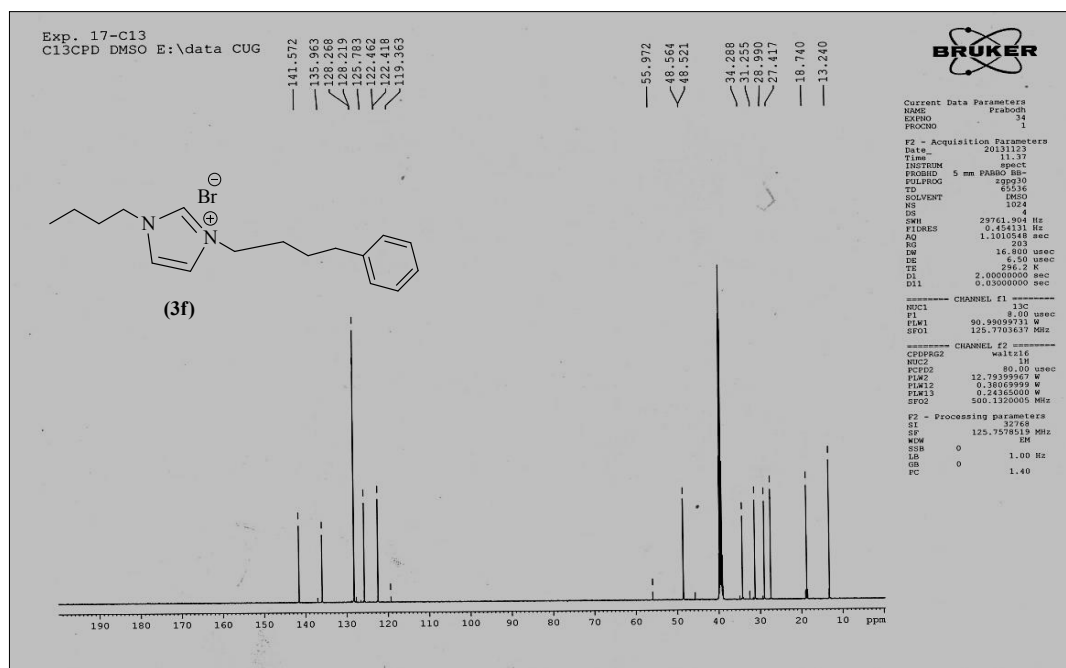

Figure 1.17:  $^{13}\text{C}$  spectra of NMR spectra of 1-butyl-3-(4-phenylbutyl)-1*H*-imidazol-3-ium (3f)

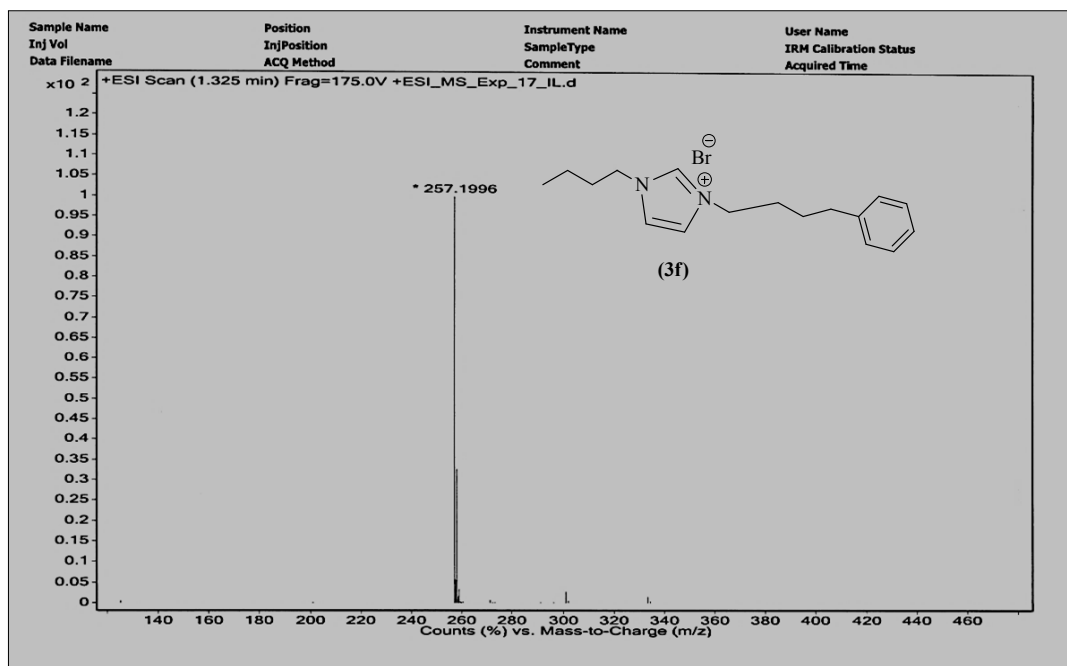

Figure 1.18: Mass spectra of NMR spectra of 1-butyl-3-(4-phenylbutyl)-1*H*-imidazol-3-ium (3f)

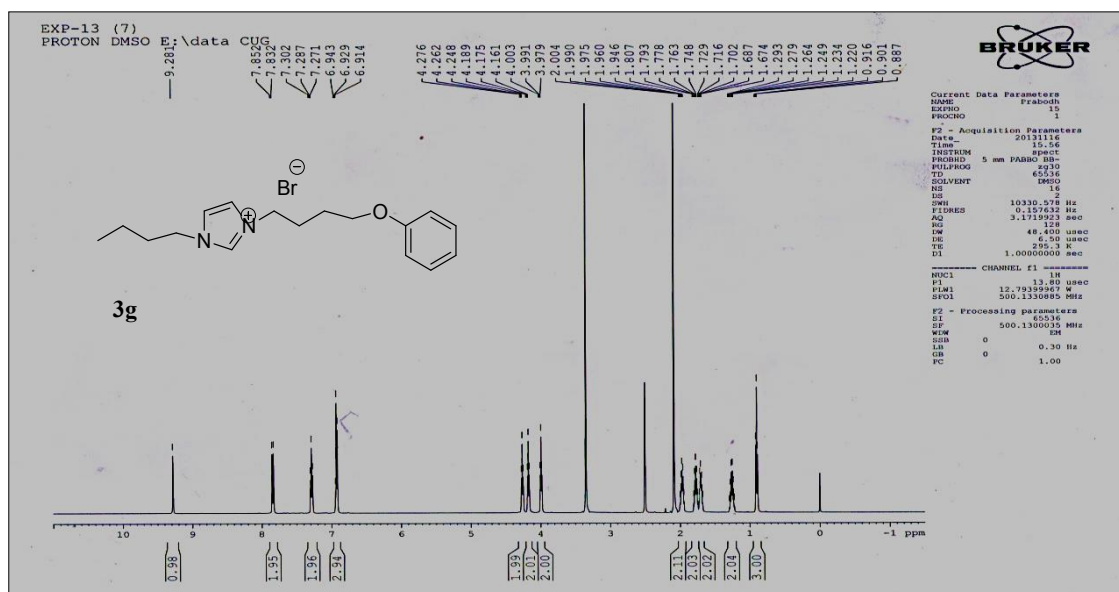

Figure 1.19: <sup>1</sup>H spectra of 1-butyl-3-(4-phenoxybutyl)-1*H*-imidazol-3-ium bromide (3g)

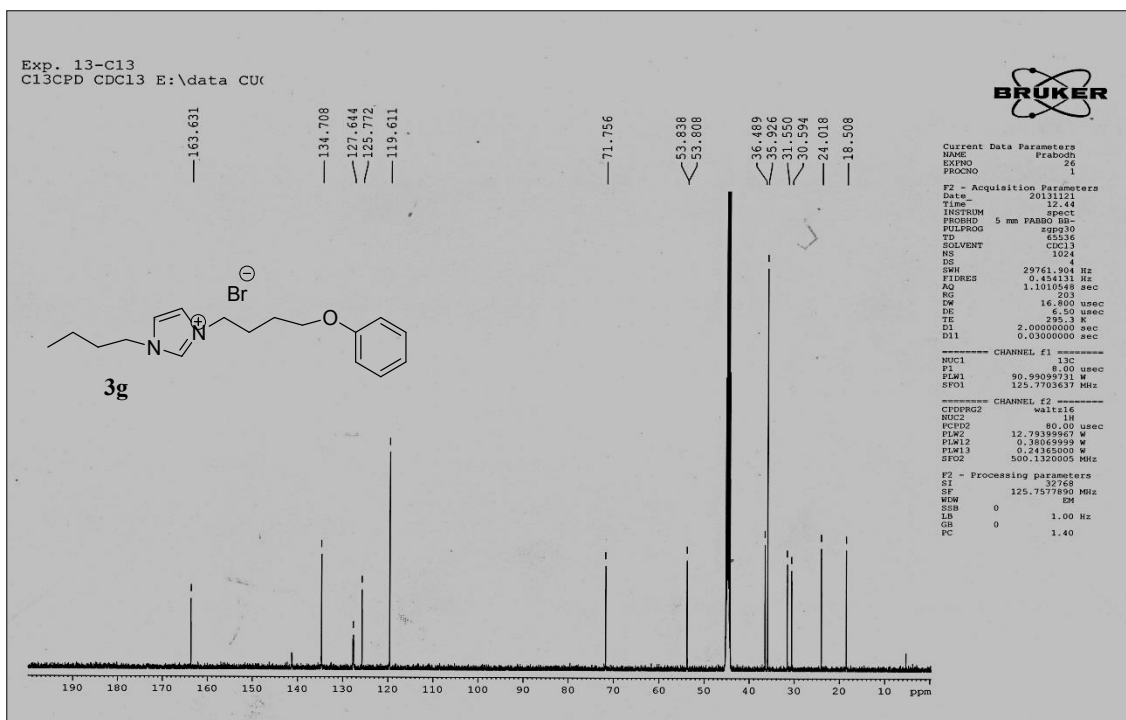

Figure 1.20:  $^{13}\text{C}$  spectra of 1-butyl-3-(4-phenoxybutyl)-1*H*-imidazol-3-ium bromide (**3g**)

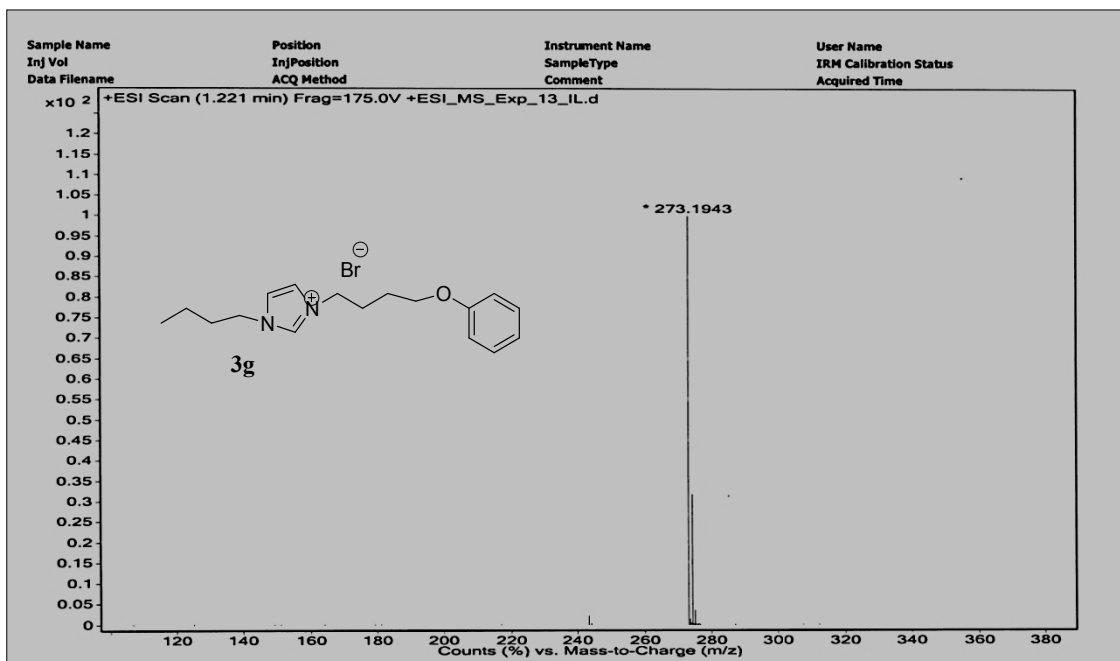

Figure 1.21: Mass spectra of 1-butyl-3-(4-phenoxybutyl)-1*H*-imidazol-3-ium bromide (**3g**)

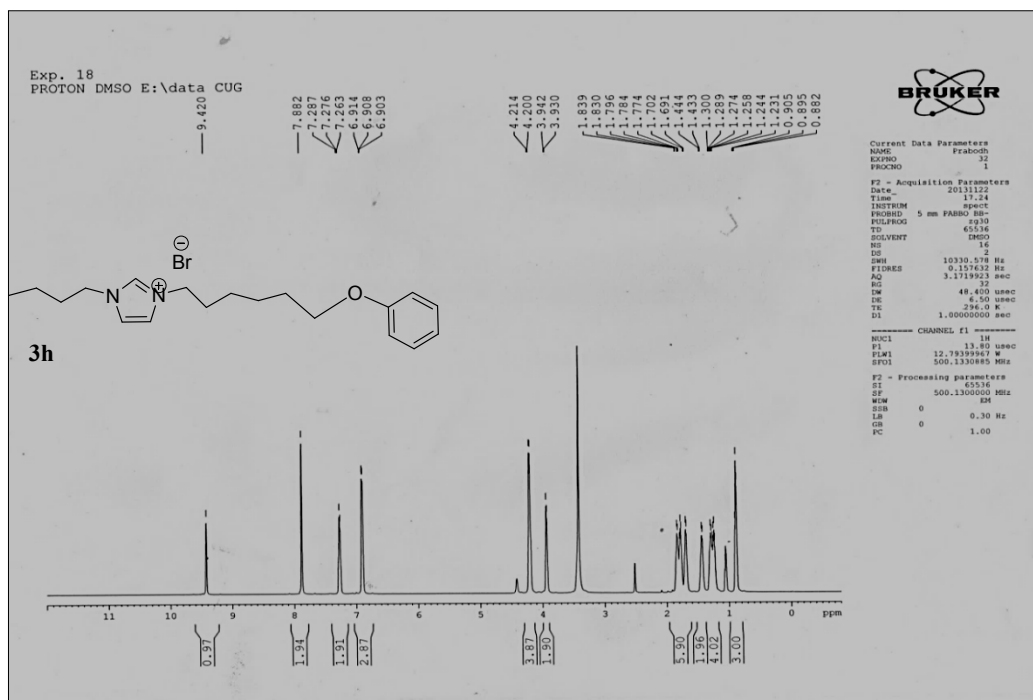

Figure 1.22:  $^1\text{H}$  spectra of 1-butyl-3-(6-phenylhexyl)-1*H*-imidazol-3-ium bromide (**3h**)

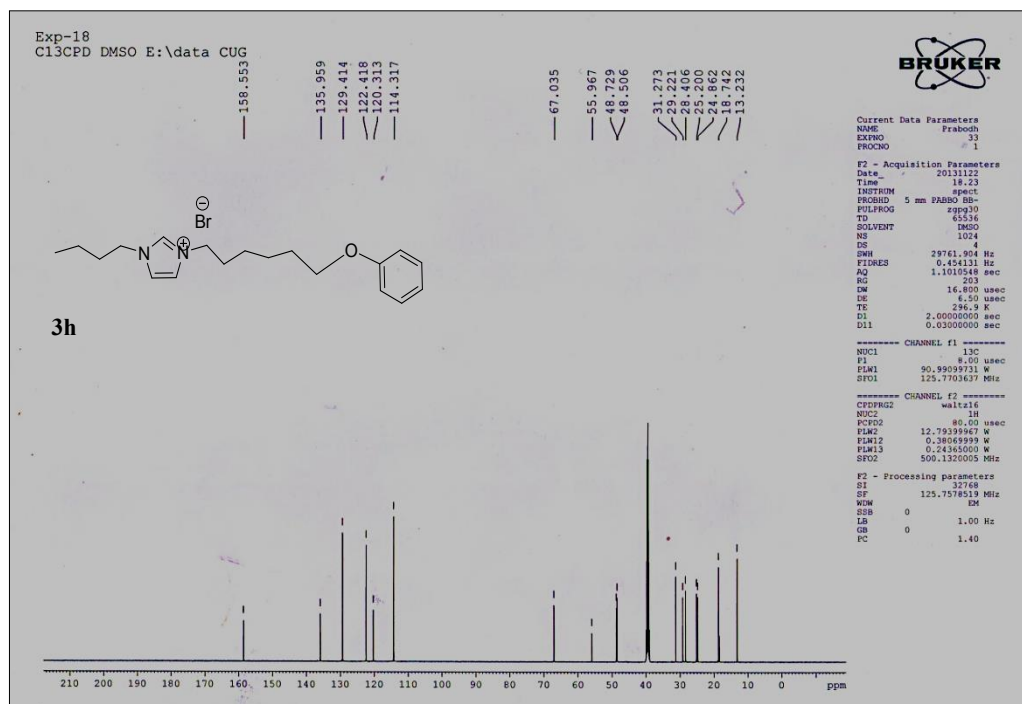

Figure 1.23:  $^{13}\text{C}$  spectra of 1-butyl-3-(6-phenylhexyl)-1*H*-imidazol-3-ium bromide (**3h**)

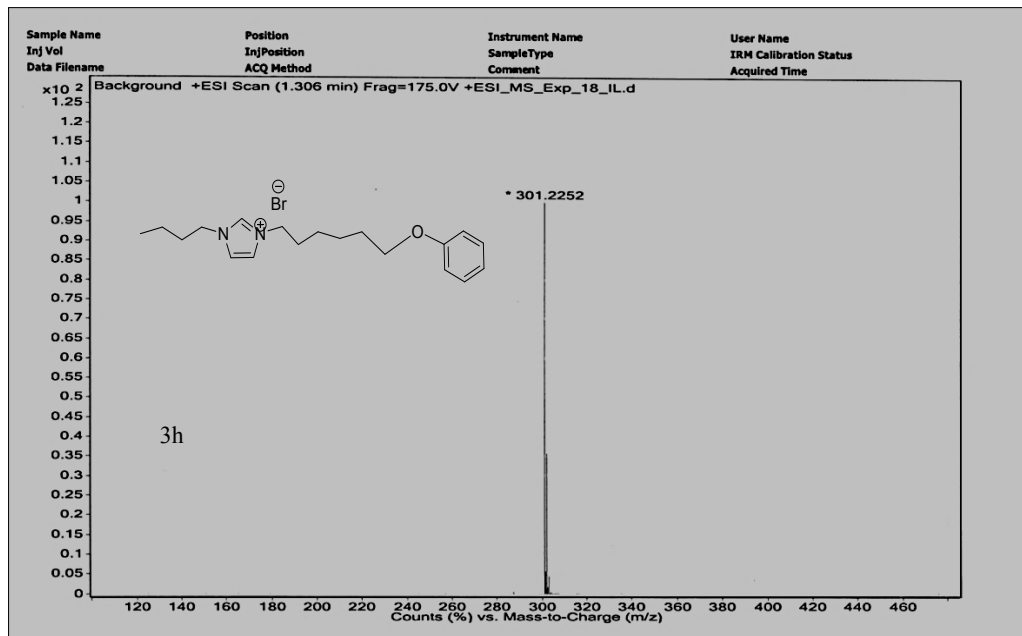

**Figure 1.24:** Mass spectra of 1-butyl-3-(6-phenylhexyl)-1*H*-imidazol-3-ium bromide (**3h**)

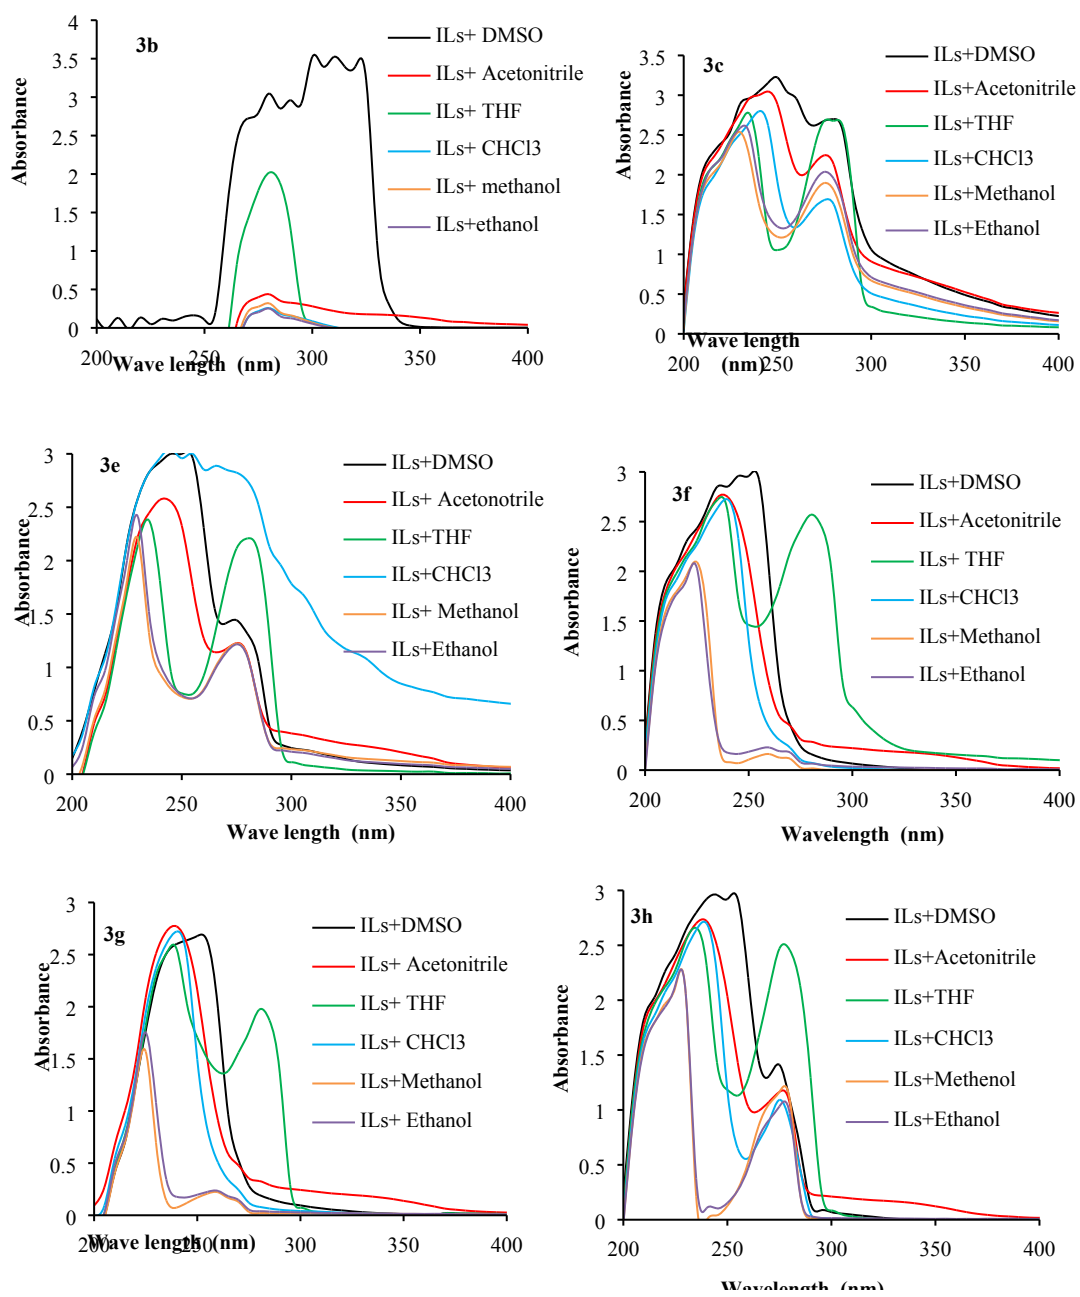

**Figure 1.25:** UV-Vis absorption spectra of ILs **3b**, **3c** and **3e-3h**
